# Supplementary material for: The Use of SMART Goals to Create Attainable Health Actions at Community Health Screenings
Source: Research Square preprint supplement (doi:10.21203/rs.3.rs-855950/v1), 2021-08-31
Supplement: Supplementary file 1 [file ccb681054b8ddd34a38ff049.xlsx]

## Sheet: with_goal150
Client Number	Gender	Smoke? (Y/N)	Age	BMI	No PMHx	DM	HTN	HLD	CAD	Thyroid	Malignancy	Mental health (depression, anxiety)	CKD	Asthma/COPD	Other (OSA, Scoliosis)	Blood Pressure	SBP	DBP	Blood Sugar	Fasting? (Y/N)	Cholesterol Total	HDL	Triglycerides	LDL	Health Action Goal Category:	Diet	Exercise	Diet + Exercise	Weight Loss	Tobacco	Alcohol	Medication adherence	PCP F/u	Follow-up achieved? (Y = 1/N = 0)	Goal Progress (Y = 1/N = 0)	Diet	Exercise	Diet + Exercise	D+E: Diet	D+E: Exercise	Weight Loss	Medication Adherence
1	F	N	54	40.4			1									158/90	158	90	89	N	230	59	145	143		1								0
2	F	Y	60	25.2				1	1							134/78	134	78	109	N	<100	48	73	--		1								1	0
3	F	N	83	31.3	1											142/80	142	80	130	N	230	39	260	140		1								1	0
4	F	N	29	25.4		1										100/63	100	63	95	Y	139	63	<50	--			1							1	0
5	F	N	51	47.8			1									118/85	118	85	122	N	166	49	166	85					1					0
6	F	N	41	45	1											117/77	117	77	129	-	178	52	174	92					1					0
7	F	N	52	37.4	1											137/88	137	88	100	Y	289	53	290	173		1								1	1	1
8	F	N	24	38.2	1											118/76	118	76	92	Y	131	44	87	69					1					1	1						1
9	F	--	71	39.2			1									168/85	168	85	108	N	134	63	103	51									1	0
10	M	N	63	26.7		1	1	1	1							136/72	136	72	322	--	112	40	176	36								1		0
11	F	N	40	38.1	1											125/69	125	69	108	N	<100	42	120	--		1								0
12	F	N	39	22.1								1				101/71	101	71	78	N	107	75	103	11		1								1	1	1
13	F	N	45	32.9			1									147/87	147	87	108	N	<100	33	133	--		1								0
14	M	N	25	26.1	1											106/70	106	70	86	N	118	50	107	46				1						0
15	F	N	67	22						1						139/74	139	74	91	N	191	65	190	87				1						1	1			1		1
16	M	N	69	28							1					133/80	133	80	101	--	118	35	76	69		1								1	1	1
17	F	N	37	45.6		1										120/70	120	70	122	N	120	40	75	65		1								0
18	F	N	76	29.2		1	1									136/82	136	82	208	--	163	44	233	72		1								1	1	1
19	F	N	40	47.2	1											110/79	110	79	101	Y	<100	42	76	--		1								1	0
20	F	N	74	27.3		1										149/87	149	87	165	N	--	--	--	--			1							0
21	F	Y	21	31	1											98/61	98	61	100	N	265	73	371	118		1								1	1	1
22	M	Y	67	30.1				1								148/84	148	84	183	N	--	--	--	--			1							0
23	F	N	44	25.4	1											124/83	124	83	93	N	189	64	185	87		1								0
24	F	N	82	22.3			1	1		1			1			112/67	112	67	111	N	<100	73	63	--		1								1	1	1
25	F	N	25	31.9	1											95/63	95	63	94	N	128	59	60	58		1								1	0
26	F	N	53	38.4	1											119/79	119	79	103	Y	193	48	103	125		1								1	0
27	F	N	15	27.3	1											107/82	107	82	122	--	--	--	--	--		1								0
28	F	N	50	25.9			1							1		137/91	137	91	131	N	196	64	292	73			1							0
29	F	N	52	24			1									143/87	143	87	136	N	151	64	67	73									1	0
30	F	-	37	25.3	1											111/79	111	79	-	N	<100	39	45	-			1							0
31	F	N	29	30.6	1											120/81	120	81	94	-	192	65	171	93			1							0
32	F	-	23	25.6	1											110/67	110	67	101	N	170	55	104	94				1						1	0
33	F	N	53	25.5			1			1						156/96	156	96	150	N	181	48	209	44		1								0
34	M	N	13	16.7	1											106/57	106	57	-	-	-	-	-	-									1	0
35	F	N	77	28.5											1	130/67	130	67	100	-	143	52	89	73		1								0
36	M	N	74	40.5	1											153/80	153	80	193	N	146	32	>500	-					1					1	1						1
37	F	N	59	25.4	1											98/50	98	50	95	N	-	-	-	-			1							0
38	F	Y	55	25.7			1	1								171/103	171	103	130	N	169	54	317	52		1								0
39	M	N	27	32.8	1											140/92	140	92	86	-	197	30	77	152									1	0
40	F	N	65	28.9				1								165/102	165	102	106	N	168	43	124	101			1							1	1		1
41	F	N	46	22.6	1											110/74	110	74	90	N	223	66	194	118		1								0
42	F	N	27	20.5								1				102/67	102	67	-	-	-	-	-	-				1						1	0
43	M	N	61	30.5		1	1									144/98	144	98	116	-	182	44	126	113				1						1	1			1	1
44	M	N	24	33.3	1											117/70	117	70	115	N	139	41	221	54				1						0
45	F	N	40	33.9	1											132/80	132	80	127	-	144	36	124	83		1								1	1	1
46	F	N	32	32.1	1											123/82	123	82	93	N	190	66	153	93				1						0
47	M	N	27	34.4	1											135/82	135	82	115	N	187	41	127	120				1						0
48	M	-	90	25.1			1				1					150/70	150	70	106	N	121	45	116	53		1								0
49	M	-	52	36.8	1											130/70	130	70	110	-	257	46	366	138		1								1	1	1
50	F	-	67	34	1											130/68	130	68	299	N	200	69	166	98		1								0
51	M	Y	42	26.8	1											130/75	130	75	108	-	-	-	-	-		1								0
52	F	-	-	33.6	1											160/82	160	82	204	N	101	41	124	35		1								0
53	M	Y	23	23.3	1											143/63	143	63	108	N	133	51	130	56		1								1	1	1
54	F	N	-	23.3	1											100/60	100	60	98	N	138	28	169	76		1								0
55	M	N	36	30.8	1											140/82	140	82	124	-	177	39	353	67		1								0
56	M	N	30	40.1	1											110/90	110	90	148	N	138	28	169	76				1						0
57	F	N	42	37.8	1											118/70	118	70	117	N	151	59	88	75			1							0
58	M	N	68	25.5	1											130/82	130	82	120	N	<100	<20	79	-		1								0
59	F	N	59	28.7	1											142/80	142	80	113	N	116	59	155	25				1						0
60	F	N	71	23.5		1	1	1								131/90	131	90	133	N	177	41	159	105								1		1	1							1
61	F	N	46	23.2	1											113/71	113	71	90	Y	<100	36	81	-			1							0
62	F	N	37	35.8	1											112/66	112	66	102	N	227	43	289	127			1							1	0
63	F	Y	44	24.9			1	1		1						125/80	125	80	97	N	201	55	485	49							1			0
64	M	N	-	-	1											152/86	152	86	147	N	105	43	>500	-		1								0
65	F	N	59	41.4	1											158/81	158	81	109	N	<100	39	83	-			1							1	1		1
66	F	-	20	26.6								1				110/76	110	76	89	N	<100	37	<50	-				1						1	0
67	M	-	70	24			1	1								129/83	129	83	87	N	138	37	232	54		1								0
68	F	-	36	45.5	1											122/62	122	62	99	N	178	65	89	96								1		0
69	F	N	58	22.6	1											149/75	149	75	129	N	166	44	233	75		1								0
70	F	N	71	34.6	1											140/84	140	84	99	N	<100	46	95	-		1								1	1	1
71	F	N	41	29.3	1											104/70	104	70	93	N	173	54	132	88		1								1	1	1
72	M	N	47	29.5	1											113/68	113	68	113	Y	183	41	157	110		1								1	1	1
73	M	N	16	36.6	1											128/75	128	75	133	-	120	36	210	43			1							0
74	F	N	64	-			1									204-111	204	111	156	-	207	62	245	96									1	0
75	F	N	39	32.1	1											105/71	105	71	107	N	223	60	159	131		1								1	0
76	M	-	-	-	1											138/86	138	86	335	-	-	42	229	90		1								0
77	F	-	64	-	1											156/87	156	87	-	-	272	86	187	149		1								0
78	F	N	54	-	1											143/80	143	80	393	-	173	55	217	75									1	0
79	F	-	44	28.1	1											110/73	110	73	195	N	225	49	326	111		1								1	1	1
80	F	N	38	31.2	1											139/85	139	85	79	-	180	53	201	87		1								1	1	1
81	F	N	45	27.4						1						125/77	125	77	134	N	<100	42	111	-		1								1	0
82	M	-	30	34.7	1											107/68	107	68	179	-	<100	29	66	-				1						1	1			1		1
83	F	N	30	35.7	1											116/72	116	72	81	N	-	-	-	-					1					1	0
84	F	N	28	29.3	1											115/70	115	70	89	N	-	-	-	-				1						0
85	F	N	28	42.6	1											120/75	120	75	127	N	-	-	-	-					1					0
86	F	N	43	24.2		1										120/65	120	65	406	N	280	31	>500	-		1								1	1	1
87	F	N	47	45.8	1											135/80	135	80	125	N	142	57	57	74					1					1	0
88	F	Y	36	34.1	1											135/100	135	100	109	Y	159	35	178	89		1								1	0
89	F	N	45	25.4	1											122/79	122	79	127	N	105	29	53	65					1					0
90	F	N	49	30.3		1	1		1							110/78	110	78	590	N	-	-	-	-		1								1	1	1
91	F	N	50	22	1											134/75	134	75	123	N	-	-	-	-		1								1	0
92	F	Y	34	44.7	1											123/63	123	63	93	N	173	49	150	94					1					1	0
93	F	Y	32	30.7								1				120/70	120	70	90	N	160	62	114	76			1							0
94	F	Y	30	26.3	1											126/88	126	88	88	Y	162	100	<50	-					1					0
95	F	N	44	26.3	1											118/81	118	81	90	Y	124	30	141	66			1							0
96	F	N	46	42	1											122/72	122	72	114	-	<100	35	<50	-		1								0
97	M	Y	26	29.9	1											130/66	130	66	81	N	<100	36	<50	-		1								0
98	F	Y	50	26.9	1											122/89	122	89	308	N	197	45	104	132		1								0
99	M	N	23	30.2	1											118/94	118	94	-	N	-	-	-	-		1								0
100	F	Y	41	54.5		1	1									135/83	135	83	154	-	-	-	-	-		1								1	1	1
101	F	N	39	39	1											118/65	118	65	100	Y	145	40	85	88		1								0
102	F	N	44	34.1	1											119/83	119	83	375	N	<100	25	<50	-					1					0
103	F	N	28	33.9	1											114/84	114	84	80	N	-	-	-	-					1					0
104	F	N	40	35.8										1		125/70	125	70	99	N	121	40	68	68		1								0
105	F	N	34	43.5	1											115/76	115	76	96	N	130	48	128	56		1								0
106	F	N	24	22.9	1											110/70	110	70	85	-	102	30	92	54		1								0
107	F	N	47	32.1			1	1								123/74	123	74	147	N	-	-	-	-					1					0
108	M	Y	25	20.6	1											116/70	116	70	99	N	133	40	64	80		1								1	1	1
109	F	N	63	32.1			1	1								121/82	121	82	187	N	<100	43	83	-		1								0
110	F	N	35	28.8	1											104/81	104	81	101	N	101	37	102	44					1					1	0
111	F	N	43	32.7										1		115/89	115	89	95	Y	<100	34	65	-			1							0
112	F	N	54	37.7	1											97/69	97	69	102	N	154	40	85	97									1	0
113	F	--	45	29.3	1											116/62	116	62	116	--	154	51	109	80				1						0
114	M	N	--	26.2		1		1								150/86	150	86	188	N	<100	36	56	56		1								0
115	M	N	49	22.4	1											113/63	113	63	124	--	219	66	92	134				1						1	1			1
116	F	N	48	47.2	1											--			98	--	<100	<20	<50	<50				1						0
117	F	N	51	25.8	1											114/82	114	82	--	--	--	--	--	--			1							0
118	F	N	35	33.8	1											121/87	121	87	91	--	180	52	189	90				1						0
119	F	N	57	28.9			1	1								120/80	120	80	99	Y	191	62	<50	-					1					1	1						1
120	F	N	54	29.1	1											120/69	120	69	108	--	--	--	--	--				1						0
121	F	N	69	31.9	1											109/68	109	68	104	--	<100	42	72	--				1						0
122	F	N	47	38.6	1											107/80	107	80	98	--	202	49	98	134				1						0
123	F	N	21	23.4	1											138/90	138	90	119	--	--	--	--	--				1						0
124	F	N	29	39.3	1											94/70	94	70	92	Y	--	--	--	--			1							0
125	F	N	19	34.8											1	106/83	106	83	245	--	161	39	244	73				1						0
126	F	N	41	52.2			1									166/109	166	109	104	--	217	47	187	133				1						1	1			1
127	F	N	56	36.9	1											111/78	111	78	109	N	123	45	154	46				1						1	1			1
128	F	N	48	33.7						1						140/92	140	92	129	--	143	38	369	32				1						0
129	M	N	46	30.5	1											130/86	130	86	127	N	157	37	225	75				1						1	1			1
130	F	N	68	35.5			1									142/98	142	98	89	Y	131	46	139	57				1						0
131	F	N	--	27	1											105/77	105	77	120	N	138	50	74	73				1						1	1			1		1
132	M	N	66	36.5	1											151/89	151	89	170	N	184	38	252	95				1						0
133	F	N	69	39.3		1	1									131/83	131	83	157	Y	116	38	127	52				1						1	1			1	1
134	M	N	37	33.4		1										135/96	135	96	266	--	114	42	159	40				1						1	1			1
135	F	--	--	33.4	1											101/58	101	58	128	--	158	31	110	105				1						1	1			1
136	M	N	60	31.8	1											122/86	122	86	131	N	285	58	210	185				1						0
137	M	-	33	41.3	1											182/100	182	100	120	Y	-	-	-	-									1	0
138	M	N	53	33.6	1											152/98	152	98	92	Y	166	43	86	106			1							0
139	F	N	70	36			1			1						147/91	147	91	153	N	170	69	117	77				1						0
140	M	-	48	33.5	1											125/88	125	88	137	Y	104	43	89	43			1							0
141	F	-	45	33.3	1											109/74	109	74	124	Y	167	51	158	84		1								0
142	M	-	47	36.3	1											146/93	146	93	99	N	148	42	66	94		1								0
143	F	N	55	48	1											147/89	147	89	348	Y	220	45	236	128		1								0
144	M	N	40	25.1	1											140/88	140	88	88	N	184	46	137	111		1								0
145	F	N	41	28.5											1	126/83	126	83	96	-	<100	36	<50	-				1						1	0
146	M	N	59	23		1	1	1								132/86	132	86	287	Y	194	66	123	104				1						1	1			1		1
147	F	N	50	42.7		1	1									148/88	148	88	440	Y	<100	63	164	-			1							1	1		1
148	M	Y	45	30.4		1										106/74	106	74	260	-	<100	<20	<50	-				1						0
149	M	Y	43	26.1		1		1								129/78	129	78	294	-	<100	25	<50	-			1							1	0
150	F	N	55	43.2	1											146/87	146	87	169	N	231	46	258	134				1						1	1			1	1
